# Supplementary material for: Aging of Preleukemic Thymocytes Drives CpG Island Hypermethylation in T-cell Acute Lymphoblastic Leukemia
Source: Oxford University Press journal article supplement (doi:10.1158/2643-3230.bcd-20-0059), 2020-09-23
Supplement: 26433230bcd200059-sup-241446_2_supp_6572431_qgj7m9.pdf [file 26433230bcd200059-sup-241446_2_supp_6572431_qgj7m9.pdf]

# Supplementary Figure 16

## CTCF Depletion vs WT

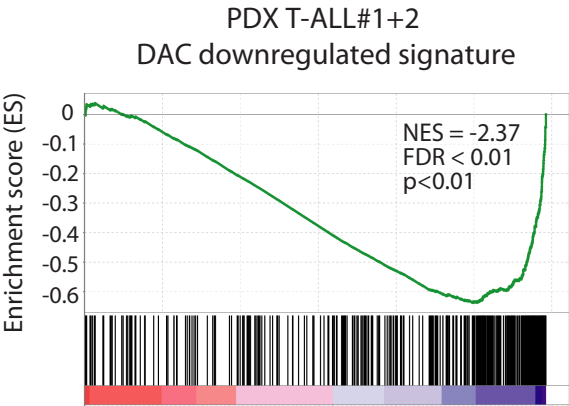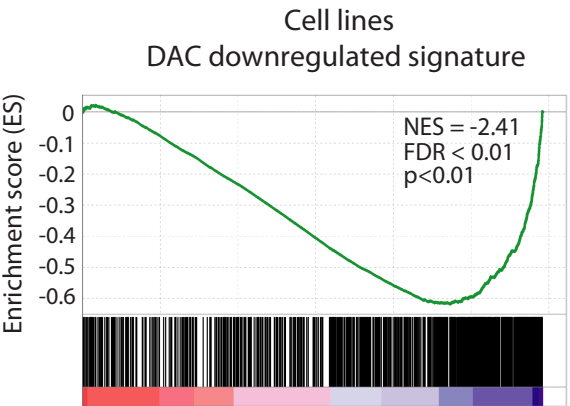

**Supplementary Figure 16. GSEA of CTCF depleted cells.** Pre-ranked GSEA of CTCF depletion compared to signature genes downregulated by Decitabine in PDX T-ALL#1 and PDX T-ALL#2 or five different T-ALL cell lines.
